# Supplementary material for: Prognostic Features of Anti-Cancer Drugs Response in Resected/Unresected Primary Non-Small Cell Lung Cancer: A Retrospective Cohort Study
Source: medRxiv preprint, doi:10.64898/2026.07.07.26357288, version 1 (2026-07-07)
Supplement: Supplementary File 1 [file 357288_file03.docx]

**Prognostic Features of Chemotherapy Response in Resected/Unresected Primary Non-Small Cell Lung Cancer Patients: A Retrospective Cohort Study**

Saikat Samadder1*

1Department of Pharmacology, Yonsei University College of Medicine, 50 Yonsei-ro, Seodaemun-Gu, Seoul, Korea

Tel: +82-2-2228-1746; Mobile: +82-10-5723-8804;

* Correspondence: Saikat Samadder

Email: saikat.samadder46@gmail.com

**Supplementary file 1**

**Table of contents**

1. Supplementary table 1: Pre-stratification NSCLC (N=2459) patient characteristics. ----------------------------------------------Page [1-6]

2. Supplementary table 2: Post-stratification NSCLC (N=2459) patient characteristics. ------------------------------------------- Page [7-10]

3. Supplementary table 3:List of singlet chemo classes applied on NSCLC (n=445) patients -------------------------------------- Page [11]

4. Supplementary table 4:List of various doublet agents applied on NSCLC (n=822) patients. ------------------------------------ Page [12]

5. Supplementary table 5: List of various triplet agents applied on NSCLC (n=623) patients. -------------------------------------- Page [13]

6. Supplementary table 6: List of various quadruplet agents applied on NSCLC (n=569) patients. -------------------------------- Page [14]

7. Supplementary table 7: Year wise deaths as per cancer treatment type received by NSCLC (n=2459) patients--------------- Page [15]

8. Supplementary table 8: List of generic names, chemo-class, and formulation type of drugs prescribed to NSCLC patient -- Page [16]

9. Supplementary table 9: List of 158 surgeries considered as other procedures ---------------------------------------------------- Page [17-19]

| **Characteristic** | **Lung cancer**  N = 2,4591 |
| --- | --- |
| Gender |  |
| Female | 779 (31.7) |
| Male | 1,680 (68.3) |
| Age (mean ±SD)  Age (median) | 63.1 ± 10.9  64 |
| Performance status ECOG |  |
| 0 | 2,346 (95.4) |
| 1 | 108 (4.4) |
| 2 | 5 (0.2) |
| NSCLC type |  |
| Adenocarcinoma | 1,683 (68.4) |
| Large-cell | 10 (0.4) |
| Squamous cell | 398 (16.2) |
| Unspecified | 368 (15.0) |
| Stage |  |
| I | 6 (0.2) |
| IA | 1 (0.0) |
| IB | 9 (0.4) |
| II | 25 (1.0) |
| IIA | 29 (1.2) |
| IIB | 38 (1.5) |
| III | 154 (6.3) |
| IIIA | 203 (8.3) |
| IIIB | 116 (4.7) |
| IIIC | 1 (0.0) |
| IV | 1,752 (71.2) |
| IVA | 6 (0.2) |
| IVB | 6 (0.2) |
| Recurred  Adjuvant  Consolidation  Induction  Maintenance  Neoadjuvant  Palliative  Salvage | 113 (4.6)  200 (7.7)  6 (0.2)  23 (0.9)  2 (0.1)  94 (3.8)  2057 (83.6)  77 (3.1) |
| Surgery |  |
| No | 1,892 (76.9) |
| Yes | 567 (23.1) |
| Radiotherapy |  |
| No | 1,552 (63.1) |
| Yes | 907 (36.9) |
| Weight (kg) | 61.8 ± 10.5 |
| Platelets (10x10^12/L) | 278.2 ± 112.4 |
| RBC (10x10^12/L) | 4.4 ± 0.5 |
| WBC (10x10^3 cells/ul) | 8.4 ± 6.5 |
| Neutrophil (10x10^3 cells/ul)  Albumin (g/dL) | 5.5 ± 2.9  3.6 ± 0.7 |
| Body surface area | 1.7 ± 0.2 |
| Chemo duration | 422.4 ± 544.9 |
| Chemo dosage | 22,008.2 ± 74,070.6 |
| Chemotherapy prescriptions | 21.4 ± 24.1 |
| Formulation type |  |
| Injection users | 1,642 (66.8) |
| Oral users | 234 (9.5) |
| Injection & Oral users | 583 (23.7) |
| Metastatic site change |  |
| 0 | 526 (21.4) |
| 1 | 627 (25.5) |
| 2 | 498 (20.3) |
| 3 | 396 (16.1) |
| 4 | 226 (9.2) |
| 5 | 105 (4.3) |
| 6 | 56 (2.3) |
| 7 | 19 (0.8) |
| 8 | 4 (0.2) |
| 9 | 2 (0.1) |
| During chemotherapy metastasis |  |
| No | 1,758 (71.5) |
| Yes | 701 (28.5) |
| Alkylating |  |
| No | 624 (25.4) |
| Yes | 1,835 (74.6) |
| Antiandrogen |  |
| No | 2,458 (100.0) |
| Yes | 1 (0.0) |
| Antimetabolite |  |
| No | 1,041 (42.3) |
| Yes | 1,418 (57.7) |
| Anti-mitotic |  |
| No | 2,080 (84.6) |
| Yes | 379 (15.4) |
| Biologics |  |
| No | 1,924 (78.2) |
| Yes | 535 (21.8) |
| Immunosuppressant |  |
| No | 2,439 (99.2) |
| Yes | 20 (0.8) |
| Kinase inhibitor |  |
| No | 2,449 (99.6) |
| Yes | 10 (0.4) |
| Pyrimidines |  |
| No | 1,855 (75.4) |
| Yes | 604 (24.6) |
| Receptor tyrosine kinase inhibitor |  |
| No | 1,667 (67.8) |
| Yes | 792 (32.2) |
| Taxane |  |
| No | 1,385 (56.3) |
| Yes | 1,074 (43.7) |
| Topoisomerase I/II inhibitor |  |
| No | 2,248 (91.4) |
| Yes | 211 (8.6) |
| **Chemo class** |  |
| Double classes | 822 (33.4) |
| Quadruple classes | 335 (13.6) |
| Quintuple or above classes | 234 (9.5) |
| Single class | 445 (18.1) |
| Comorbidity |  |
| No | 1,323 (53.8) |
| Yes | 1,136 (46.2) |
| Diabetes |  |
| No | 2,063 (83.9) |
| Yes | 396 (16.1) |
| Anemia |  |
| No | 2,293 (93.2) |
| Yes | 166 (6.8) |
| Fatty liver |  |
| No | 2,438 (99.1) |
| Yes | 21 (0.9) |
| Chronic liver disease |  |
| No | 2,402 (97.7) |
| Yes | 57 (2.3) |
| Anxiety |  |
| No | 2,266 (92.2) |
| Yes | 193 (7.8) |
| Obsessive compulsive disorder |  |
| No | 2,457 (99.9) |
| Yes | 2 (0.1) |
| Panic disorder |  |
| No | 2,456 (99.9) |
| Yes | 3 (0.1) |
| Chronic obstructive pulmonary disease |  |
| No | 2,076 (84.4) |
| Yes | 383 (15.6) |
| Chronic kidney disease |  |
| No | 2,392 (97.3) |
| Yes | 67 (2.7) |
| Renal failure |  |
| No | 2,344 (95.3) |
| Yes | 115 (4.7) |
| Coronary artery disease |  |
| No | 2,294 (93.3) |
| Yes | 165 (6.7) |
| Hypothyroidism |  |
| No | 2,331 (94.8) |
| Yes | 128 (5.2) |
| Hyperthyroidism |  |
| No | 2,429 (98.8) |
| Yes | 30 (1.2) |
| Lobectomy |  |
| No | 2,193 (89.2) |
| Yes | 266 (10.8) |
| Lung transplant |  |
| No | 2,458 (100.0) |
| Yes | 1 (0.0) |
| Lymph node dissection |  |
| No | 2,142 (87.1) |
| Yes | 317 (12.9) |
| Pleurectomy |  |
| No | 2,458 (100.0) |
| Yes | 1 (0.0) |
| Pneumonectomy |  |
| No | 2,435 (99.0) |
| Yes | 24 (1.0) |
| Segmentectomy |  |
| No | 2,451 (99.7) |
| Yes | 8 (0.3) |
| Thoracotomy |  |
| No | 2,452 (99.7) |
| Yes | 7 (0.3) |
| Thymectomy |  |
| No | 2,458 (100.0) |
| Yes | 1 (0.0) |
| Other procedure |  |
| No | 2,099 (85.4) |
| Yes | 360 (14.6) |
| Wedge resection |  |
| No | 2,320 (94.3) |
| Yes | 139 (5.7) |
| 1n (%); Mean ± SD | |

**Supplementary table 1:** Pre-stratification NSCLC (N=2459) patient characteristics.

| **Characteristic** | **Overall**  N = 2,4591 | **Group-A**  N = 1,2891 | **Group-B**  N = 6481 | **Group-C** N = 5221 |
| --- | --- | --- | --- | --- |
| **Gender** |  |  |  |  |
| Female | 779 (31.7) | 386 (29.9) | 202 (31.2) | 191 (36.6) |
| Male | 1,680 (68.3) | 903 (70.1) | 446 (68.8) | 331 (63.4) |
| **Age** | 63.1 ± 10.9 | 64.6 ± 11.0 | 62.4 ± 10.3 | 60.2 ± 11.0 |
| **PS ECOG** |  |  |  |  |
| 0 | 2,346 (95.4) | 1,218 (94.5) | 626 (96.6) | 502 (96.2) |
| 1 | 108 (4.4) | 66 (5.1) | 22 (3.4) | 20 (3.8) |
| 2 | 5 (0.2) | 5 (0.4) | 0 (0.0) | 0 (0.0) |
| **Non-small cell lung cancer type** |  |  |  |  |
| Adenocarcinoma | 1,683 (68.4) | 878 (68.1) | 436 (67.3) | 369 (70.7) |
| Large-cell | 10 (0.4) | 5 (0.4) | 3 (0.5) | 2 (0.4) |
| Squamous cell | 398 (16.2) | 212 (16.4) | 108 (16.7) | 78 (14.9) |
| Unspecified | 368 (15.0) | 194 (15.1) | 101 (15.6) | 73 (14.0) |
| **Stage** |  |  |  |  |
| I | 6 (0.2) | 1 (0.1) | 5 (0.8) | 0 (0.0) |
| IA | 1 (0.0) | 0 (0.0) | 1 (0.2) | 0 (0.0) |
| IB | 9 (0.4) | 5 (0.4) | 2 (0.3) | 2 (0.4) |
| II | 25 (1.0) | 13 (1.0) | 2 (0.3) | 10 (1.9) |
| IIA | 29 (1.2) | 9 (0.7) | 14 (2.2) | 6 (1.1) |
| IIB | 38 (1.5) | 14 (1.1) | 15 (2.3) | 9 (1.7) |
| III | 154 (6.3) | 67 (5.2) | 48 (7.4) | 39 (7.5) |
| IIIA | 203 (8.3) | 72 (5.6) | 71 (11.0) | 60 (11.5) |
| IIIB | 116 (4.7) | 42 (3.3) | 42 (6.5) | 32 (6.1) |
| IIIC | 1 (0.0) | 1 (0.1) | 0 (0.0) | 0 (0.0) |
| IV | 1,752 (71.2) | 1,008 (78.2) | 413 (63.7) | 331 (63.4) |
| IVA | 6 (0.2) | 4 (0.3) | 1 (0.2) | 1 (0.2) |
| IVB | 6 (0.2) | 3 (0.2) | 1 (0.2) | 2 (0.4) |
| Recurred | 113 (4.6) | 50 (3.9) | 33 (5.1) | 30 (5.7) |
| **Treatment Type**  Adjuvant  Consolidation  Induction  Maintenance  Neoadjuvant  Palliative  Salvage  **Surgery** | 200 (7.7)  6 (0.2)  23 (0.9)  2 (0.1)  94 (3.8)  2057 (83.6)  77 (3.1) | 67 (5.2)  4 (0.3)  5 (0.4)  1 (0.1)  42 (3.3)  1,138 (88.3)  32 (2.5) | 72 (11.1)  1 (0.2)  9 (1.4)  0 (0.0)  29 (4.5)  508 (78.4)  29 (4.5) | 61 (11.7)  1 (0.2)  9 (1.7)  1 (0.2)  23 (4.4)  411 (78.7)  16 (3.1) |
| No | 1,892 (76.9) | 1,048 (81.3) | 483 (74.5) | 361 (69.2) |
| Yes | 567 (23.1) | 241 (18.7) | 165 (25.5) | 161 (30.8) |
| **Radiotherapy** |  |  |  |  |
| No | 1,552 (63.1) | 972 (75.4) | 353 (54.5) | 227 (43.5) |
| Yes | 907 (36.9) | 317 (24.6) | 295 (45.5) | 295 (56.5) |
| Weight | 61.8 ± 10.5 | 60.8 ± 10.4 | 62.9 ± 10.4 | 63.2 ± 10.8 |
| Platelets (10^12 cells/L) | 278.2 ± 112.4 | 282.1 ± 118.8 | 276.1 ± 108.5 | 271.0 ± 100.3 |
| RBC (10^12 cells/L) | 4.4 ± 0.5 | 4.3 ± 0.6 | 4.4 ± 0.5 | 4.5 ± 0.5 |
| WBC (10^3 cells/ul)  Neutrophil (10^3 cells/ul) | 8.4 ± 6.5  5.5 ± 3.3 | 9.1 ± 6.5  5.8 ± 3.6 | 7.9 ± 5.3  5.4 ± 3 | 7.4 ± 7.8  5.0 ± 2.6 |
| Albumin (g/dL) | 3.6 ± 0.7 | 3.5 ± 0.7 | 3.7 ± 0.6 | 3.9 ± 0.6 |
| BSA | 1.7 ± 0.2 | 1.7 ± 0.2 | 1.7 ± 0.2 | 1.7 ± 0.2 |
| Chemo duration | 422.4 ± 544.9 | 153.5 ± 232.1 | 461.2 ± 426.3 | 1,038.2 ± 693.7 |
| Total treatment dosage (mg or mg/m2) | 22,008.2 ± 74,070.6 | 9,640.3 ± 26,020.2 | 19,093.0 ± 49,114.8 | 56,167.7 ± 140,202.4 |
| Anti-cancer drug prescription frequency | 21.4 ± 24.1 | 7.3 ± 4.3 | 21.9 ± 4.2 | 55.5 ± 31.7 |
| **Formulation type** |  |  |  |  |
| Injection users | 1,642 (66.8) | 930 (72.1) | 444 (68.5) | 268 (51.3) |
| Oral users | 234 (9.5) | 196 (15.2) | 25 (3.9) | 13 (2.5) |
| Oral & Injection users | 583 (23.7) | 163 (12.6) | 179 (27.6) | 241 (46.2) |
| **Metastatic site Change** |  |  |  |  |
| Nil or no new metastasis | 526 (21.4) | 301 (23.4) | 125 (19.3) | 100 (19.2) |
| 1 | 627 (25.5) | 345 (26.8) | 157 (24.2) | 125 (23.9) |
| 2 | 498 (20.3) | 263 (20.4) | 129 (19.9) | 106 (20.3) |
| 3 | 396 (16.1) | 192 (14.9) | 119 (18.4) | 85 (16.3) |
| 4 | 226 (9.2) | 113 (8.8) | 59 (9.1) | 54 (10.3) |
| 5 | 105 (4.3) | 46 (3.6) | 31 (4.8) | 28 (5.4) |
| 6 | 56 (2.3) | 21 (1.6) | 22 (3.4) | 13 (2.5) |
| 7 | 19 (0.8) | 7 (0.5) | 4 (0.6) | 8 (1.5) |
| 8 | 4 (0.2) | 0 (0.0) | 2 (0.3) | 2 (0.4) |
| 9 | 2 (0.1) | 1 (0.1) | 0 (0.0) | 1 (0.2) |
| **During chemotherapy metastasis** |  |  |  |  |
| No | 1,758 (71.5) | 1,030 (79.9) | 433 (66.8) | 295 (56.5) |
| Yes | 701 (28.5) | 259 (20.1) | 215 (33.2) | 227 (43.5) |
| Alkylating |  |  |  |  |
| No | 624 (25.4) | 496 (38.5) | 75 (11.6) | 53 (10.2) |
| Yes | 1,835 (74.6) | 793 (61.5) | 573 (88.4) | 469 (89.8) |
| Antiandrogen |  |  |  |  |
| No | 2,458 (100.0) | 1,289 (100.0) | 648 (100.0) | 521 (99.8) |
| Yes | 1 (0.0) | 0 (0.0) | 0 (0.0) | 1 (0.2) |
| Antimetabolite |  |  |  |  |
| No | 1,041 (42.3) | 744 (57.7) | 204 (31.5) | 93 (17.8) |
| Yes | 1,418 (57.7) | 545 (42.3) | 444 (68.5) | 429 (82.2) |
| Anti-mitotic |  |  |  |  |
| No | 2,080 (84.6) | 1,202 (93.3) | 517 (79.8) | 361 (69.2) |
| Yes | 379 (15.4) | 87 (6.7) | 131 (20.2) | 161 (30.8) |
| Biologics |  |  |  |  |
| No | 1,924 (78.2) | 1,135 (88.1) | 480 (74.1) | 309 (59.2) |
| Yes | 535 (21.8) | 154 (11.9) | 168 (25.9) | 213 (40.8) |
| Immunosuppressant |  |  |  |  |
| No | 2,439 (99.2) | 1,284 (99.6) | 644 (99.4) | 511 (97.9) |
| Yes | 20 (0.8) | 5 (0.4) | 4 (0.6) | 11 (2.1) |
| Kinase inhibitor |  |  |  |  |
| No | 2,449 (99.6) | 1,288 (99.9) | 645 (99.5) | 516 (98.9) |
| Yes | 10 (0.4) | 1 (0.1) | 3 (0.5) | 6 (1.1) |
| Pyrimidines |  |  |  |  |
| No | 1,855 (75.4) | 1,165 (90.4) | 460 (71.0) | 230 (44.1) |
| Yes | 604 (24.6) | 124 (9.6) | 188 (29.0) | 292 (55.9) |
| Receptor tyrosine kinase inhibitors |  |  |  |  |
| No | 1,667 (67.8) | 935 (72.5) | 449 (69.3) | 283 (54.2) |
| Yes | 792 (32.2) | 354 (27.5) | 199 (30.7) | 239 (45.8) |
| Taxane |  |  |  |  |
| No | 1,385 (56.3) | 796 (61.8) | 353 (54.5) | 236 (45.2) |
| Yes | 1,074 (43.7) | 493 (38.2) | 295 (45.5) | 286 (54.8) |
| Topoisomerase inhibitors |  |  |  |  |
| No | 2,248 (91.4) | 1,235 (95.8) | 587 (90.6) | 426 (81.6) |
| Yes | 211 (8.6) | 54 (4.2) | 61 (9.4) | 96 (18.4) |
| **Chemo Class** |  |  |  |  |
| Double chemo classes | 822 (33.4) | 623 (48.3) | 164 (25.3) | 35 (6.7) |
| Quadruple chemo classes | 335 (13.6) | 40 (3.1) | 149 (23.0) | 146 (28.0) |
| Quintuple or above classes | 234 (9.5) | 6 (0.5) | 43 (6.6) | 185 (35.4) |
| Single chemo class | 445 (18.1) | 394 (30.6) | 34 (5.2) | 17 (3.3) |
| Triple chemo classes | 623 (25.3) | 226 (17.5) | 258 (39.8) | 139 (26.6) |
| Comorbidity |  |  |  |  |
| No | 1,323 (53.8) | 747 (58.0) | 338 (52.2) | 238 (45.6) |
| Yes | 1,136 (46.2) | 542 (42.0) | 310 (47.8) | 284 (54.4) |
| Diabetes |  |  |  |  |
| No | 2,063 (83.9) | 1,107 (85.9) | 535 (82.6) | 421 (80.7) |
| Yes | 396 (16.1) | 182 (14.1) | 113 (17.4) | 101 (19.3) |
| Anemia |  |  |  |  |
| No | 2,293 (93.2) | 1,220 (94.6) | 608 (93.8) | 465 (89.1) |
| Yes | 166 (6.8) | 69 (5.4) | 40 (6.2) | 57 (10.9) |
| Fatty liver |  |  |  |  |
| No | 2,438 (99.1) | 1,279 (99.2) | 641 (98.9) | 518 (99.2) |
| Yes | 21 (0.9) | 10 (0.8) | 7 (1.1) | 4 (0.8) |
| Chronic liver disease |  |  |  |  |
| No | 2,402 (97.7) | 1,269 (98.4) | 635 (98.0) | 498 (95.4) |
| Yes | 57 (2.3) | 20 (1.6) | 13 (2.0) | 24 (4.6) |
| Anxiety |  |  |  |  |
| No | 2,266 (92.2) | 1,202 (93.3) | 590 (91.0) | 474 (90.8) |
| Yes | 193 (7.8) | 87 (6.7) | 58 (9.0) | 48 (9.2) |
| Obsessive compulsive disorder |  |  |  |  |
| No | 2,457 (99.9) | 1,287 (99.8) | 648 (100.0) | 522 (100.0) |
| Yes | 2 (0.1) | 2 (0.2) | 0 (0.0) | 0 (0.0) |
| Panic disorder |  |  |  |  |
| No | 2,456 (99.9) | 1,288 (99.9) | 647 (99.8) | 521 (99.8) |
| Yes | 3 (0.1) | 1 (0.1) | 1 (0.2) | 1 (0.2) |
| Chronic obstructive pulmonary disease |  |  |  |  |
| No | 2,076 (84.4) | 1,084 (84.1) | 542 (83.6) | 450 (86.2) |
| Yes | 383 (15.6) | 205 (15.9) | 106 (16.4) | 72 (13.8) |
| Chronic kidney disease |  |  |  |  |
| No | 2,392 (97.3) | 1,263 (98.0) | 630 (97.2) | 499 (95.6) |
| Yes | 67 (2.7) | 26 (2.0) | 18 (2.8) | 23 (4.4) |
| Renal failure |  |  |  |  |
| No | 2,344 (95.3) | 1,237 (96.0) | 619 (95.5) | 488 (93.5) |
| Yes | 115 (4.7) | 52 (4.0) | 29 (4.5) | 34 (6.5) |
| Coronary artery disease |  |  |  |  |
| No | 2,294 (93.3) | 1,209 (93.8) | 603 (93.1) | 482 (92.3) |
| Yes | 165 (6.7) | 80 (6.2) | 45 (6.9) | 40 (7.7) |
| Hypothyroidism |  |  |  |  |
| No | 2,331 (94.8) | 1,245 (96.6) | 611 (94.3) | 475 (91.0) |
| Yes | 128 (5.2) | 44 (3.4) | 37 (5.7) | 47 (9.0) |
| Hyperthyroidism |  |  |  |  |
| No | 2,429 (98.8) | 1,276 (99.0) | 637 (98.3) | 516 (98.9) |
| Yes | 30 (1.2) | 13 (1.0) | 11 (1.7) | 6 (1.1) |
| Lobectomy (liver) |  |  |  |  |
| No | 2,193 (89.2) | 1,172 (90.9) | 568 (87.7) | 453 (86.8) |
| Yes | 266 (10.8) | 117 (9.1) | 80 (12.3) | 69 (13.2) |
| Lung transplant |  |  |  |  |
| No | 2,458 (100.0) | 1,288 (99.9) | 648 (100.0) | 522 (100.0) |
| Yes | 1 (0.0) | 1 (0.1) | 0 (0.0) | 0 (0.0) |
| Lymph node dissection |  |  |  |  |
| No | 2,142 (87.1) | 1,151 (89.3) | 553 (85.3) | 438 (83.9) |
| Yes | 317 (12.9) | 138 (10.7) | 95 (14.7) | 84 (16.1) |
| Pleurectomy |  |  |  |  |
| No | 2,458 (100.0) | 1,288 (99.9) | 648 (100.0) | 522 (100.0) |
| Yes | 1 (0.0) | 1 (0.1) | 0 (0.0) | 0 (0.0) |
| Pneumonectomy |  |  |  |  |
| No | 2,435 (99.0) | 1,279 (99.2) | 642 (99.1) | 514 (98.5) |
| Yes | 24 (1.0) | 10 (0.8) | 6 (0.9) | 8 (1.5) |
| Segmentectomy |  |  |  |  |
| No | 2,451 (99.7) | 1,284 (99.6) | 646 (99.7) | 521 (99.8) |
| Yes | 8 (0.3) | 5 (0.4) | 2 (0.3) | 1 (0.2) |
| Thoracotomy |  |  |  |  |
| No | 2,452 (99.7) | 1,286 (99.8) | 645 (99.5) | 521 (99.8) |
| Yes | 7 (0.3) | 3 (0.2) | 3 (0.5) | 1 (0.2) |
| Thymectomy |  |  |  |  |
| No | 2,458 (100.0) | 1,288 (99.9) | 648 (100.0) | 522 (100.0) |
| Yes | 1 (0.0) | 1 (0.1) | 0 (0.0) | 0 (0.0) |
| Other procedure |  |  |  |  |
| No | 2,099 (85.4) | 1,132 (87.8) | 552 (85.2) | 415 (79.5) |
| Yes | 360 (14.6) | 157 (12.2) | 96 (14.8) | 107 (20.5) |
| Wedge resection |  |  |  |  |
| No | 2,320 (94.3) | 1,223 (94.9) | 613 (94.6) | 484 (92.7) |
| Yes | 139 (5.7) | 66 (5.1) | 35 (5.4) | 38 (7.3) |
| 1n (%); Mean ± SD | | | | |

**Supplementary table 2:** Post-stratification non-small cell lung cancer patient (N=2459) characteristics.

| **Characteristic** | **Overall**  N = 4451 | **Group-B**  N = 341 | **Group-A**  N = 3941 | **Group-C** N = 171 |
| --- | --- | --- | --- | --- |
| First Line Singlet Type |  |  |  |  |
| Alkylating | 15 (3.4) | 0 (0.0) | 15 (3.8) | 0 (0.0) |
| Anti-mitotic | 9 (2.0) | 1 (2.9) | 8 (2.0) | 0 (0.0) |
| Antimetabolite | 78 (17.5) | 4 (11.8) | 71 (18.0) | 3 (17.6) |
| Biologics | 42 (9.4) | 2 (5.9) | 39 (9.9) | 1 (5.9) |
| Pyrimidines | 22 (4.9) | 2 (5.9) | 20 (5.1) | 0 (0.0) |
| Taxane | 47 (10.6) | 1 (2.9) | 45 (11.4) | 1 (5.9) |
| Topoisomerase I inhibitor | 4 (0.9) | 0 (0.0) | 4 (1.0) | 0 (0.0) |
| Topoisomerase II inhibitor | 1 (0.2) | 0 (0.0) | 1 (0.3) | 0 (0.0) |
| Receptor tyrosine kinase inhibitor | 227 (51.0) | 24 (70.6) | 191 (48.5) | 12 (70.6) |
| Post chemotherapy OS | 12.9 ± 18.2 | 31.0 ± 19.6 | 9.1 ± 11.4 | 64.9 ± 36.7 |
| 1n (%); Mean ± SD | | | | |

**Supplementary table 3:** List of singlet chemo classes applied on NSCLC (n=445) patients. All these patients received single chemo class until death.

| **Characteristic** | **Overall**  N = 8221 | **Group-B**  N = 1641 | **Group-A**  N = 6231 | **Group-C**  N = 351 |
| --- | --- | --- | --- | --- |
| First Line Doublet User |  |  |  |  |
| Alkylating, Anti-mitotic | 53 (6.4) | 14 (8.5) | 39 (6.3) | 0 (0.0) |
| Alkylating, Pyrimidines | 77 (9.4) | 26 (15.9) | 46 (7.4) | 5 (14.3) |
| Alkylating, Taxane | 288 (35.0) | 31 (18.9) | 255 (40.9) | 2 (5.7) |
| Antimetabolite, Alkylating | 201 (24.5) | 38 (23.2) | 152 (24.4) | 11 (31.4) |
| Antimetabolite, Taxane | 20 (2.4) | 2 (1.2) | 18 (2.9) | 0 (0.0) |
| Antimetabolite, Receptor tyrosine kinase inhibitor | 27 (3.3) | 3 (1.8) | 21 (3.4) | 3 (8.6) |
| Other Combinations | 82 (10.0) | 15 (9.1) | 58 (9.3) | 9 (25.7) |
| Topoisomerase II Inhibitor, Alkylating | 74 (9.0) | 35 (21.3) | 34 (5.5) | 5 (14.3) |
| Post chemotherapy OS | 10.9 ± 14.8 | 16.2 ± 17.6 | 8.3 ± 12.1 | 32.0 ± 20.3 |
| 1n (%); Mean ± SD | | | | |

**Supplementary table 4:** List of various doublet agents applied on NSCLC (n=822) patients. All these patients received double chemo classes until death.

| **Characteristic** | **Overall**  N = 6231 | **Group-B**  N = 2581 | **Group-A**  N = 2261 | **Group-C**  N = 1391 |
| --- | --- | --- | --- | --- |
| First Line combinations of Triplet User |  |  |  |  |
| Alkylating, Anti-mitotic | 46 (7.4) | 29 (11.2) | 6 (2.7) | 11 (7.9) |
| Alkylating, Pyrimidines | 42 (6.7) | 22 (8.5) | 8 (3.5) | 12 (8.6) |
| Alkylating, Taxane | 215 (34.5) | 90 (34.9) | 92 (40.7) | 33 (23.7) |
| Antimetabolite, Alkylating | 143 (23.0) | 62 (24.0) | 61 (27.0) | 20 (14.4) |
| Antimetabolite, Taxane | 5 (0.8) | 1 (0.4) | 1 (0.4) | 3 (2.2) |
| Other Doublet Combination | 101 (16.2) | 29 (11.2) | 42 (18.6) | 30 (21.6) |
| Topoisomerase II Inhibitor, Alkylating | 34 (5.5) | 12 (4.7) | 2 (0.9) | 20 (14.4) |
| Receptor tyrosine kinase inhibitor, Antimetabolite | 37 (5.9) | 13 (5.0) | 14 (6.2) | 10 (7.2) |
| Triplet Users Triplet Type |  |  |  |  |
| Other triplets | 208 (33.4) | 83 (32.2) | 83 (36.7) | 42 (30.2) |
| Triplet as Biologics | 125 (20.1) | 56 (21.7) | 49 (21.7) | 20 (14.4) |
| Triplet as Pyrimidines | 72 (11.6) | 36 (14.0) | 10 (4.4) | 26 (18.7) |
| Triplet as RTKI | 121 (19.4) | 44 (17.1) | 57 (25.2) | 20 (14.4) |
| Triplet as Taxane | 64 (10.3) | 29 (11.2) | 22 (9.7) | 13 (9.4) |
| Triplet as Topoisomerase I/II inhibitors | 33 (5.3) | 10 (3.9) | 5 (2.2) | 18 (12.9) |
| Post chemotherapy OS | 19.3 ± 18.9 | 18.3 ± 14.2 | 10.7 ± 14.7 | 35.0 ± 22.8 |
| 1n (%); Mean ± SD | | | | |

**Supplementary table 5:** List of various triplet agents applied on NSCLC (n=623) patients. All these patients received doublet & triplet chemo classes until death. Tyrosine kinase inhibitors are same as (RTKI) mentioned in abbreviation section of main text.

| **Characteristic** | **Overall**  N = 5691 | **Group-B**  N = 1921 | **Group-A**  N = 461 | **Group-C**  N = 3311 |
| --- | --- | --- | --- | --- |
| Second Line Users First Line Doublet Type |  |  |  |  |
| Alkylating, Anti-mitotic | 61 (10.7) | 21 (10.9) | 1 (2.2) | 39 (11.8) |
| Alkylating, Antimetabolite | 126 (22.1) | 50 (26.0) | 8 (17.4) | 68 (20.5) |
| Alkylating, Taxane | 167 (29.3) | 70 (36.5) | 12 (26.1) | 85 (25.7) |
| Alkylating, Topoisomerase II Inhibitor | 13 (2.3) | 5 (2.6) | 0 (0.0) | 8 (2.4) |
| Antimetabolite, Taxane | 9 (1.6) | 1 (0.5) | 0 (0.0) | 8 (2.4) |
| Other combinations as first line doublet | 61 (10.7) | 14 (7.3) | 10 (21.7) | 37 (11.2) |
| Pyrimidines, Alkylating | 34 (6.0) | 9 (4.7) | 3 (6.5) | 22 (6.6) |
| Receptor tyrosine kinase inhibitor, Alkylating | 49 (8.6) | 8 (4.2) | 6 (13.0) | 35 (10.6) |
| Receptor tyrosine kinase inhibitor, Antimetabolite | 49 (8.6) | 14 (7.3) | 6 (13.0) | 29 (8.8) |
| Second Line User Quadruplet Type |  |  |  |  |
| Alkylating, Antimetabolite | 11 (1.9) | 4 (2.1) | 1 (2.2) | 6 (1.8) |
| Alkylating, Biologics | 33 (5.8) | 10 (5.2) | 4 (8.7) | 19 (5.7) |
| Alkylating, Pyrimidines | 18 (3.2) | 3 (1.6) | 0 (0.0) | 15 (4.5) |
| Anti-mitotic, Biologics | 33 (5.8) | 17 (8.9) | 1 (2.2) | 15 (4.5) |
| Antimetabolite, Biologics | 44 (7.7) | 11 (5.7) | 5 (10.9) | 28 (8.5) |
| Antimetabolite, Pyrimidines | 38 (6.7) | 14 (7.3) | 5 (10.9) | 19 (5.7) |
| Antimetabolite, Taxane | 18 (3.2) | 7 (3.6) | 2 (4.3) | 9 (2.7) |
| Antimetabolite, Receptor tyrosine kinase inhibitor | 82 (14.4) | 34 (17.7) | 7 (15.2) | 41 (12.4) |
| Biologics, Pyrimidines | 54 (9.5) | 19 (9.9) | 0 (0.0) | 35 (10.6) |
| Other Combination as quadruplet | 56 (9.9) | 12 (6.3) | 3 (6.5) | 41 (12.4) |
| Pyrimidines, Anti-mitotic | 24 (4.2) | 7 (3.6) | 2 (4.3) | 15 (4.5) |
| Pyrimidines, Taxane | 26 (4.6) | 10 (5.2) | 2 (4.3) | 14 (4.2) |
| Taxane, Alkylating | 16 (2.8) | 3 (1.6) | 2 (4.3) | 11 (3.3) |
| Taxane, Anti-mitotic | 13 (2.3) | 2 (1.0) | 1 (2.2) | 10 (3.0) |
| Taxane, Biologics | 43 (7.6) | 19 (9.9) | 4 (8.7) | 20 (6.0) |
| Taxane, Tyrosine kinase inhibitor | 20 (3.5) | 4 (2.1) | 2 (4.3) | 14 (4.2) |
| Receptor tyrosine kinase inhibitor, Biologics | 18 (3.2) | 8 (4.2) | 4 (8.7) | 6 (1.8) |
| Receptor tyrosine kinase inhibitor, Pyrimidines | 22 (3.9) | 8 (4.2) | 1 (2.2) | 13 (3.9) |
| Post chemotherapy OS | 29.1 ± 21.7 | 20.7 ± 16.9 | 11.4 ± 11.1 | 36.4 ± 22.2 |
| 1n (%); Mean ± SD | | | | |

**Supplementary table 6:** List of various quadruplet agents applied on NSCLC (n=569) patients. All these patients received doublet & quadruplet chemo classes until death. Tyrosine kinase inhibitors are same as (RTKI) mentioned in abbreviation section of main text.

| **Year wise Deaths** | **Overall**  **N = 24591** | **Adjuvant**  **N = 2001** | **Consolidation**  **N = 61** | **Induction**  **N = 231** | **Maintenance**  **N = 21** | **Neoadjuvant**  **N - 941** | **Palliative**  **N = 20571** | **Salvage**  **N = 771** |
| --- | --- | --- | --- | --- | --- | --- | --- | --- |
| Group-A  1-Year Deaths | N = 1,289  1,002 (77.7) | N = 67  36 (53.7) | N = 4  3 (75.0) | N = 5  4 (80.0) | N = 1  0 (0.0) | N = 42  31 (73.8) | N = 1,138  905 (79.5) | N = 32  23 (71.9) |
| 2-Year Deaths | 190 (14.7) | 10 (14.9) | 0 (0.0) | 1 (20.0) | 0 (0.0) | 9 (21.4) | 162 (14.2) | 8 (25.0) |
| 3-Year Deaths | 51 (4.0) | 8 (11.9) | 0 (0.0) | 0 (0.0) | 1 (100.0) | 1 (2.4) | 41 (3.6) | 0 (0.0) |
| 4-Year Deaths | 24 (1.9) | 3 (4.5) | 1 (25.0) | 0 (0.0) | 0 (0.0) | 0 (0.0) | 19 (1.7) | 1 (3.1) |
| 5-Year Deaths  >6 Year Deaths  Group-B  1-Year Deaths  2-Year Deaths  3-Year Deaths  4-Year Deaths  5-Year Deaths  >6 Year Deaths  Group-C  1-Year Deaths  2-Year Deaths  3-Year Deaths  4-Year Deaths  5-Year Deaths  >6 Year Deaths | 7 (0.5)  15 (1.2)  N = 648  294 (45.4)  183 (28.2)  89 (13.7)  44 (6.8)  18 (2.8)  20 (3.1)  N = 522  48 (9.2)  142 (27.2)  126 (24.1)  87 (16.7)  36 (6.9)  83 (15.9) | 2 (3.0)  8 (11.9)  N = 72  18 (25.0)  23 (31.9)  12 (16.7)  9 (12.5)  4 (5.6)  6 (8.3)  N = 61  2 (3.3)  10 (16.4)  16 (26.2)  15 (24.6)  3 (4.9)  15 (24.6) | 0 (0.0)  0 (0.0)  N = 1  1 (100.0)  0 (0.0)  0 (0.0)  0 (0.0)  0 (0.0)  0 (0.0)  N = 1  0 (0.0)  0 (0.0)  1 (100.0)  0 (0.0)  0 (0.0)  0 (0.0) | 0 (0.0)  0 (0.0)  N = 9  3 (33.3)  4 (44.4)  1 (11.1)  1 (11.1)  0 (0.0)  0 (0.0)  N = 9  0 (0.0)  2 (22.2)  2 (22.2)  1 (11.1)  0 (0.0)  4 (44.4) | 0 (0.0)  0 (0.0)  N = 0  0 (0.0)  0 (0.0)  0 (0.0)  0 (0.0)  0 (0.0)  0 (0.0)  N = 1  0 (0.0)  0 (0.0)  1 (100.0)  0 (0.0)  0 (0.0)  0 (0.0) | 0 (0.0)  1 (2.4)  N = 29  12 (41.4)  8 (27.6)  4 (13.8)  2 (6.9)  1 (3.4)  2 (6.9)  N = 23  2 (8.7)  7 (30.4)  6 (26.1)  5 (21.7)  0 (0.0)  3 (13.0) | 5 (0.4)  6 (0.5)  N = 508  247 (48.6)  136 (26.8)  69 (13.6)  31 (6.1)  13 (2.6)  12 (2.4)  N = 411  42 (10.2)  119 (29.0)  96 (23.4)  64 (15.6)  31 (7.5)  59 (14.4) | 0 (0.0)  0 (0.0)  N = 29  13 (44.8)  12 (41.4)  13 (44.8)  1 (3.4)  0 (0.0)  0 (0.0)  N = 16  2 (12.5)  4 (25.0)  4 (25.0)  2 (12.5)  2 (12.5)  2 (12.5) |
| 1n (%) | | | | | | | | |

**Supplementary table 7: Year wise deaths as per cancer treatment type received by NSCLC (n=2459) patients.**

| Generic Names | Chemo Class | Formulation |
| --- | --- | --- |
| Etoposide | Topoisomerase II Inhibitor | Injection |
| Cisplatin | Alkylating | Injection |
| Pemetrexed | Antimetabolite | Injection |
| Nivolumab | Biologics | Injection |
| Carboplatin | Alkylating | Injection |
| Paclitaxel | Taxane | Injection |
| Atezolizumab | Biologics | Injection |
| Gemcitabine | Pyrimidines | Injection |
| Vinorelbine | Anti-mitotic | Injection |
| Docetaxel | Taxane | Injection |
| Pembrolizumab | Biologics | Injection |
| Gefitinib | Tyrosine kinase inhibitor | Oral |
| Osimertinib | Tyrosine kinase inhibitor | Oral |
| Topotecan | Topoisomerase I Inhibitor | Oral |
| Crizotinib | Tyrosine kinase inhibitor | Oral |
| Afatinib | Tyrosine kinase inhibitor | Oral |
| Irinotecan | Topoisomerase I Inhibitor | Injection |
| Trastuzumab | Biologics | Injection |
| Capecitabine | Pyrimidines | Oral |
| fluorouracil | Pyrimidines | Injection |
| Erlotinib | Tyrosine kinase inhibitor | Oral |
| Ifosfamide | Alkylating | Injection |
| Iretinib | Tyrosine kinase inhibitor | Oral |
| Ceritinib | Tyrosine kinase inhibitor | Oral |
| Bevacizumab | Biologics | Injection |
| Doxorubicin | Topoisomerase II Inhibitor | Injection |
| Vincristine | Anti-mitotic | Injection |
| Cyclophosphamide | Immunosuppressant | Injection |
| Topotecan | Topoisomerase I Inhibitor | Injection |
| Sunitinib | Tyrosine kinase inhibitor | Oral |
| Everolimus | Immunosuppressant | Oral |
| Gimeracil, oteracil, Tegafur | Pyrimidines | Oral |
| Oxaliplatin | Alkylating | Injection |
| Belotecan | Topoisomerase I Inhibitor | Injection |
| Durvalumab | Biologics | Injection |
| Ramucirumab | Biologics | Injection |
| Alectinib | Tyrosine kinase inhibitor | Oral |
| Dabrafenib | Kinase inhibitor | Oral |
| Trametinib | Kinase inhibitor | Oral |
| Ipilimumab | Biologics | Injection |
| Eribulin | Anti-mitotic | Injection |
| Cytarabine | Pyrimidines | Injection |
| Enzalutamide | Antiandrogen | Oral |
| Olaratumab | Biologics | Injection |
| Lazertinib | Tyrosine kinase inhibitor | Oral |
| Cetuximab | Biologics | Injection |
| Lenvatinib | Tyrosine kinase inhibitor | Oral |
| Pazopanib | Tyrosine kinase inhibitor | Oral |
| Rituximab | Biologics | Injection |
| Imatinib | Tyrosine kinase inhibitor | Oral |
| Azacitidine | Antimetabolite | Injection |
| Decitabine | Pyrimidines | Injection |
| Axitinib | Tyrosine kinase inhibitor | Oral |
| Lorlatinib | Kinase inhibitor | Oral |
| Methotrexate | Immunosuppressant | Injection |
| Vinblastine | Anti-mitotic | Injection |
| Lubinectedin | Alkylating | Injection |
| Brigatinib | Tyrosine kinase inhibitor | Oral |

**Supplementary table 8:** List of generic names, chemo-class, and formulation type of drugs prescribed to NSCLC patients. Using generic names anti-cancer classes were derived and formulation type was derived from trade names available in EMR. There are more than 195 trade names with different formulation type of above mentioned 58 generic products.

| **Other Surgery Types** |
| --- |
| Excision of chest wall mass by thoracotomy |
| VATS () |
| Empyemectomy under VATS |
| Pleural biopsy under VATS |
| Open lung biopsy |
| Incisional biopsy of mediastinum |
| Mediastinal mass excision under VATS |
| Bullectomy under VATS, left |
| Mediastinoscopy |
| Excision of mediastinal mass, right |
| Pleural biopsy |
| Mediastinal dissection |
| Rib resection under VATS (video assisted thoracoscopic surgery) |
| VATS (video assisted thoracoscopic surgery)-Bullectomy, right |
| Excision of lesion of mediastinum |
| Mediastinal tumor excision under VATS |
| Lung biopsy |
| Excision of mediastinal tumor |
| Cervical mediastinoscopy |
| Wedge biopsy of liver |
| Thoracoscopic pleurodesis |
| Lung biopsy under VATS |
| Thoracoscopic pleural biopsy |
| Bullectomy, right |
| Excision of chest wall mass(malignant)(soft tissue) |
| Pleurolysis, left |
| Repair of diaphragm, right |
| Biopsy by mediastinoscopy |
| Mediastinal mass excision under VATS, right |
| Subtotal esophagectomy under VATS (video assisted thoracoscopic surgery) |
| pleural mass excision |
| Thoracoscopic wedge biopsy of lung |
| Mediastinotomic biopsy |
| Pleural mass excision under VATS (video assisted thoracoscopic surgery) |
| Excision of mediastinal malignant tumor |
| Mass excision, chest wall |
| Incision and Drainage |
| Repair of diaphragmatic hernia, left |
| Excision of mediastinal cyst |
| Biopsy of mediastinum by endoscope |
| Bleeder ligation (heart and lung postop) |
| Empyema cavity irrigation under VATS |
| Pulmonary arterigraphy |
| Excision of chest wall mass(benign) |
| Mediastinal tumor excision |
| VATS (video assisted thoracoscopic surgery)-Bullectomy |
| Mediastinotomy |
| Partial resection, rib, left |
| Decortication under VATS |
| Pleurolysis, right |
| Mediastinal mass excision under VATS, left |
| (SP) Robot assisted thoracoscopic excision of mediastinal mass (complex) (gradeⅠ)((SP) |
| Open pleural biopsy |
| Bullectomy under VATS |
| Excision of pleural mass |
| Rib resection (2nd rib) |
| Empyemectomy under VATS, left |
| Pleurodesis |
| Excision of mediastinal mass, left |
| Decortication of lung, left |
| Thoracoscopy |
| Broncho-pleural fistula closure (Repair of BPF) |
| Excision of mediastinal tumor under VATS |
| Chest tube insertion, bilateral |
| Rib resection |
| Partial rib resection |
| Pleural biopsy by explo thoracotomy |
| Enucleation of lung mass |
| Postopertive bleeder ligation (heart and lung postop) |
| Decortication under VATS, left |
| Empyemectomy under VATS, right |
| Incisional biopsy of chest wall mass |
| Irrigation and Drainage |
| Percutaneous cardiopulmonary bypass |
| VATS (video assisted thoracoscopic surgery)-Bullectomy, left |
| Pleural mass excision under VATS (video assisted thoracoscopic surgery), left |
| Excision of bronchus, wide sleeve |
| Pulmonary artery thrombectomy |
| Lung abscess incision |
| Suture of lung |
| Needle biopsy of lung |
| Open reduction of rib fracture |
| Removal of chest wall foreign body(other) |
| Open lung biopsy under VATS |
| Mediastinal tumor excision, Rt |
| Mediastinal tracheostomy |
| Decortication of lung |
| Decortication of lung and parietal pleurectomy |
| Mediastinoscopic lung biopsy |
| Sympathicotomy under VATS |
| En-bloc resection of chest wall(left) |
| Diaphragm repair under VATS |
| Partial resection of mediastinal tumor |
| Excision of mediastinal mass, left |
| Decortication under VATS, right |
| Acellular Dermal Graft [other, over 100cm2~under 400cm2] |
| Repair of diaphragmatic hernia |
| Chest tube insertion |
| Repair of diaphragm, left |
| Excision of bronchial tumor |
| Lung biopsy, open |
| VATS (video assisted thoracoscopic surgery)-Excision of lesion of diaphragm |
| Pleurolysis by VATS (video assisted thoracoscopic surgery) |
| Bullectomy, left |
| Mediastinal bleeder ligation |
| Other diagnostic procedures on mediastinum |
| Thoracoscopic lung biopsy |
| Bullectomy |
| Acellular Dermal Graft [other, under 25cm2] |
| Abscess incision and Drainage |
| Chest wall mass excision under VATS (video assisted thoracoscopic surgery), right |
| Partial resection of the rib |
| Decortication of lung, right |
| Excision of chest wall |
| Incision and drainage of chest wall |
| Excision of bulla of lung |
| Mediastinal mass excision via lateral thoracotomy |
| Chest wall mass excision (soft tissue malignant tumor) |
| Segmental rib resection |
| Excision of chest wall mass(malignant) by thoracotomy |
| Rib resection(other) |
| Repair of diaphragmatic hernia (left) |
| Mediastinotomy for drainage(thoracotomy) |
| Diaphragmatic plication under VATS |
| Mediastinotomy for drainage(closed) |
| Open lung biopsy by thoracotomy |
| Anterior mediastinostomy by thoracotomy |
| Rib biopsy,open |
| Syringo-pleural shunt |
| Repair of direct inguinal hernia, left |
| Pleural mass excision, right |
| Puncture bx. of kidney, liver, lung |
| VATS (video assisted thoracoscopic surgery)-Incisional biopsy of mediastinum |
| Repair of diaphragmatic hernia, abdominal approach, left |
| Lung suture |
| Robot assisted thoracoscopic excision of mediastinal mass (simple) (grade I) |
| Pulmonary artery thromboendarterectomy |
| Excision of mediastinal mass,left |
| Repair of direct inguinal hernia, right |
| mediastinotomy for drainage |
| Radiofrequency ablation of lung |
| Bullectomy under VATS, right |
| Photodynamic therapy under VATS |
| Deep vein thrombectomy(chest) |
| Mediastinotomy for drainage |
| Chest wall reconstruction, right |
| T3 sympathicotomy under VATS, bilateral |
| VATS (video assisted thoracoscopic surgery)-Pericardial window formation |
| Pulmonary valvulotomy |
| Robot assisted thoracoscopic excision of mediastinal mass (complex) (grade I) |
| Pulmonary arterioplasty |
| Robot assisted thoracoscopic excision of mediastinal mass (simple) (benign) |
| Robot assisted thoracoscopic excision of mediastinal mass (grade II) |
| Sympathectomy under VATS (video assisted thoracoscopic surgery) |
| Chest wall mass excision under VATS (video assisted thoracoscopic surgery) |
| Enucleation of hamartoma, lung |
| Chest wall mass excision under VATS (video assisted thoracoscopic surgery), left |
| Single-port thoracoscopic pleural biopsy, left |

**Supplementary table 9:** List of 158 surgeries considered as other procedures.
